# Supplementary material for: RAB13 mRNA compartmentalisation spatially orients tissue morphogenesis
Source: PubMed Central journal article supplement (PMC7604621; doi:10.15252/embj.2020106003), 2020-09-18
Supplement: EMBJ-39-e106003-s001.pdf [file EMBJ-39-e106003-s001.pdf]

## Expanded View Figures

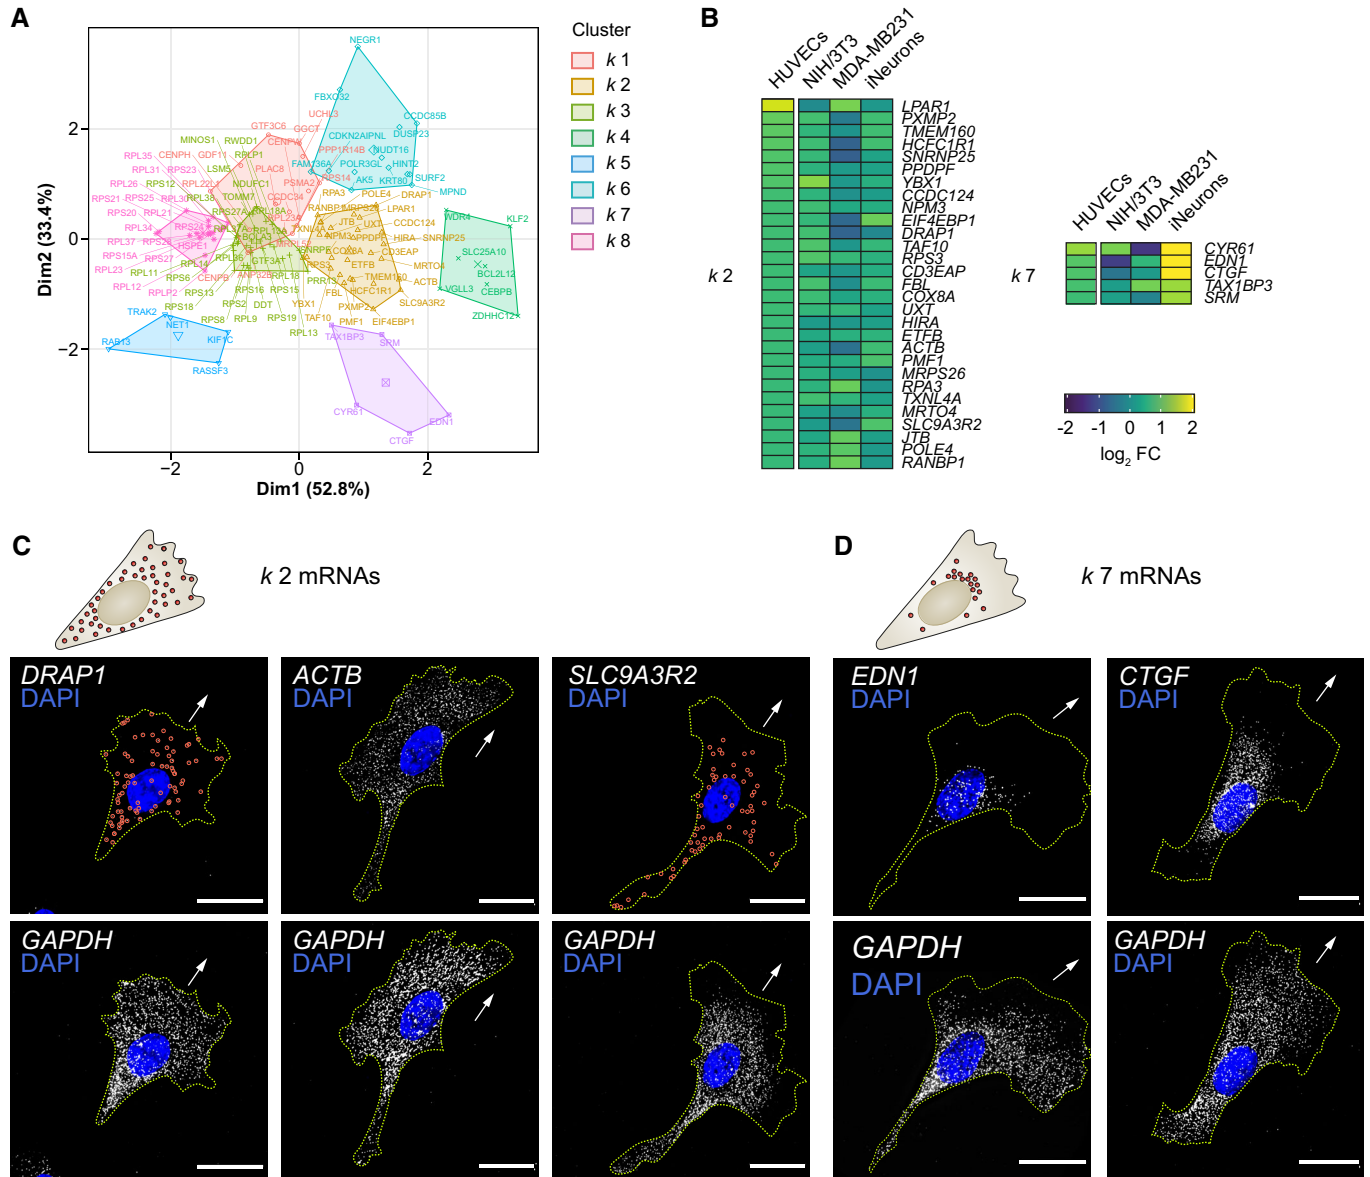

**Figure EV1. Clustering of RNAseq datasets defines unexpected cell type-specific diversity to mRNA polarisation.**

A Principal component plot depicting the *k*-means clustering analysis of mRNAs enriched across cell protrusion types.

B Detail of the heat map shown in Fig 1C representing log<sub>2</sub> fold change (FC) levels (protrusions over cell bodies) of mRNAs present in clusters *k* 2 and *k* 7. The corresponding HUVEC log<sub>2</sub> FC levels are shown in parallel.

C Top: distribution pattern of mRNAs clustered in *k* 2. Bottom: smFISH co-detection of *k* 2 mRNAs and *GAPDH* in HUVECs.

D Top: distribution pattern of mRNAs clustered in *k* 7. Bottom: smFISH co-detection of *k* 7 mRNAs and *GAPDH* in HUVECs.

Data information: arrows indicate the orientation of RNA localisation; yellow dashed lines outline cell borders; red circles highlight smFISH spots; scale bars = 20 μm (C, D).

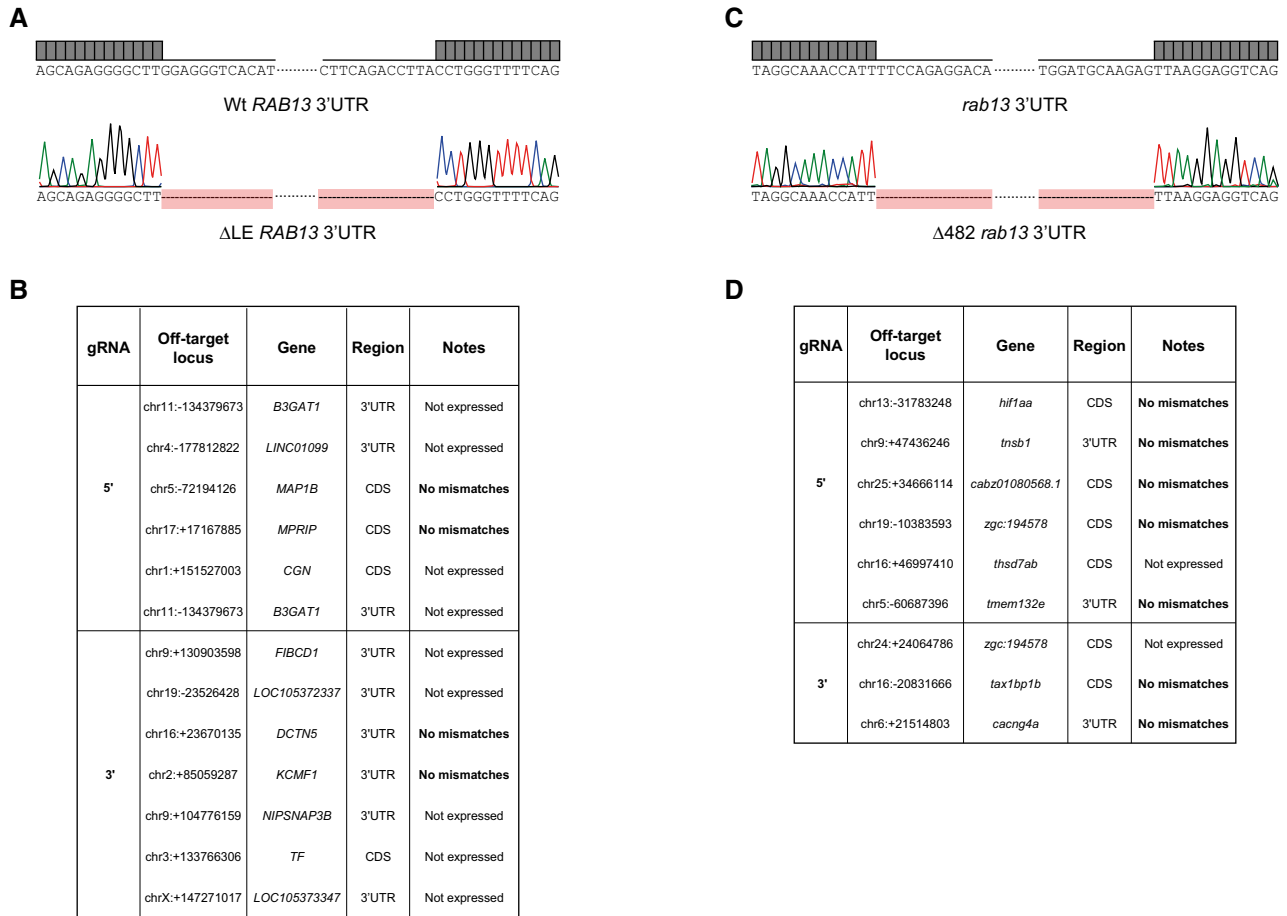

**Figure EV2. CRISPR-Cas9 editing of the RAB 3'UTR *in vitro* and *in vivo* does not generate off-target mutations.**

- A Chromatogram confirming the excision of the LE within *RAB13* 3'UTR in HUVECs.  
 B List of predicted CRISPR-Cas9 off-target genes and RNAseq mismatch detection in CRISPR-Cas9-derived HUVEC clones ( $n = 1$  each genotype).  
 C Chromatogram confirming the CRISPR-Cas9-mediated excision of 482-nt within the *rab13* 3'UTR in zebrafish embryos.  
 D List of predicted CRISPR-Cas9 off-target genes and RNAseq mismatch detection in *Tg(kdrl:EGFP) rab13<sup>+/+</sup>* and *rab13<sup>Δ3'UTR/Δ3'UTR</sup>* embryos ( $n = 2$  each genotype).

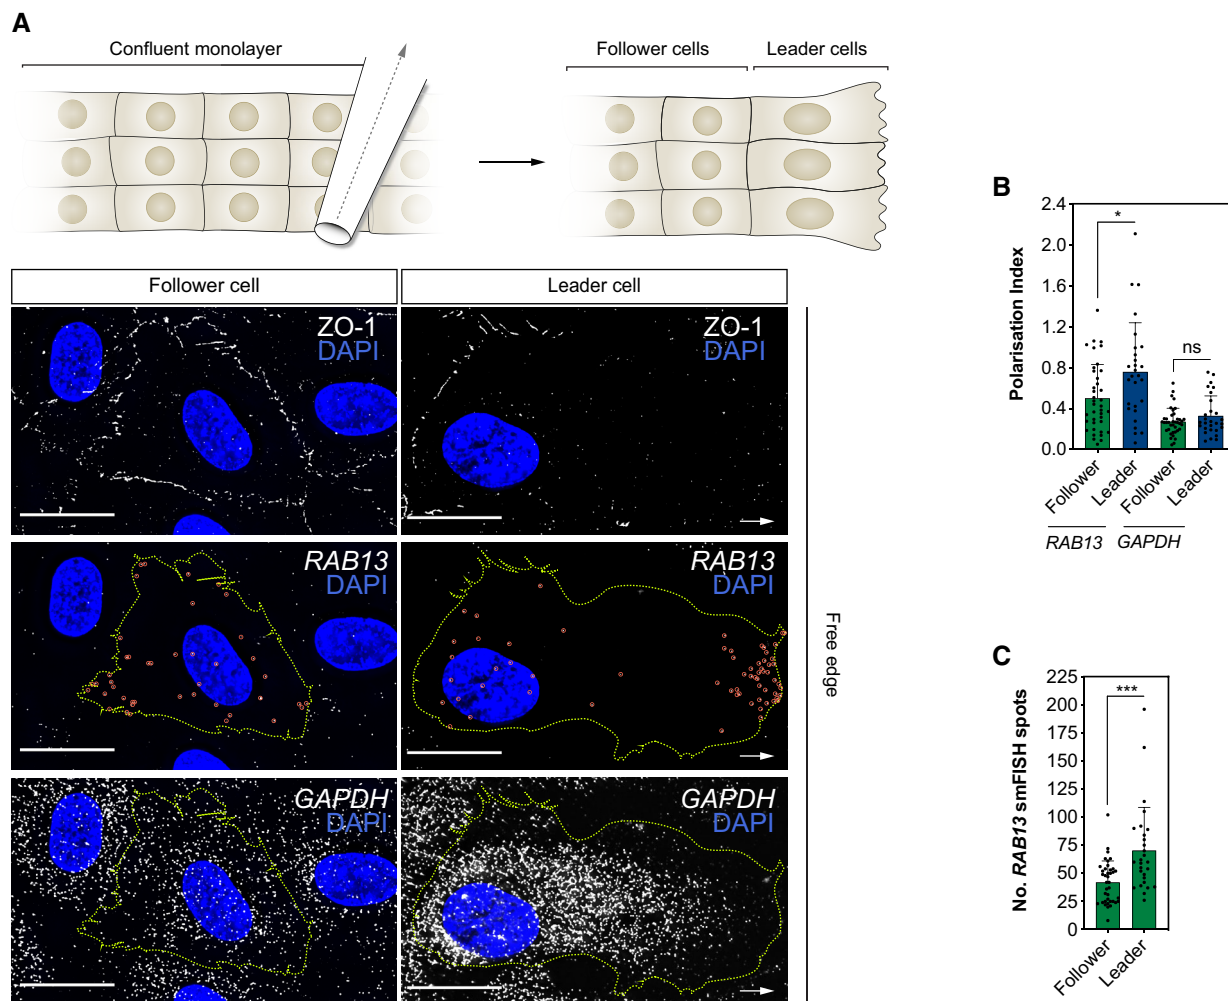

**Figure EV3. Induction of endothelial cell collective migration drives *RAB13* mRNA polarisation in leader cells.**

**A** Top: scratch wound assay generates a free edge on a confluent monolayer of HUVECs and encourages cell migration. Bottom: smFISH co-detection of *RAB13* mRNA and *GAPDH* mRNA in representative HUVECs migrating in a scratch wound assay. ZO-1 immunolabelling defines cell boundaries.

**B** Polarisation Index of *RAB13* and *GAPDH* co-detected in HUVECs cultured in scratch wound assays ( $n \geq 28$  cells;  $*P < 0.05$ ; ns: not significant; Mann–Whitney test).

**C** Quantification of the number of *RAB13* mRNA smFISH spots per cell ( $n \geq 28$  cells;  $***P < 0.001$ ; Mann–Whitney test). Leader: cells identified at the edge of the scratch; follower: cells identified in confluent regions adjacent to leader cells.

Data information: arrows indicate orientation of RNA localisation; yellow dashed lines outline cell borders; red circles highlight smFISH spots; scale bars = 20  $\mu\text{m}$  (A). Bar charts are presented as means  $\pm$  s.d.

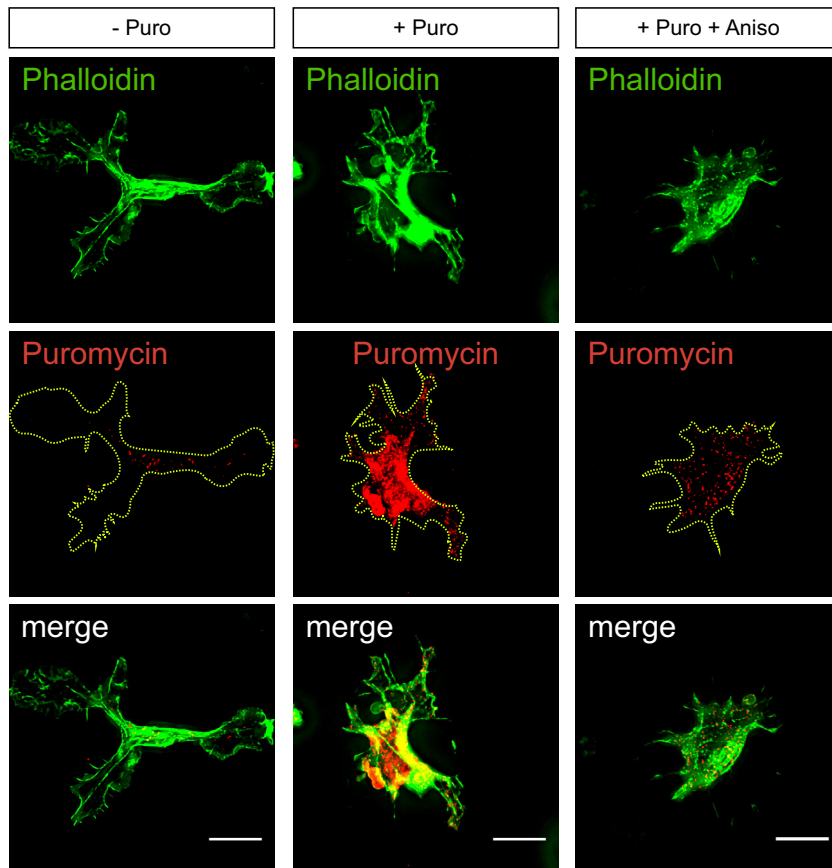

**Figure EV4. Protein translation in endothelial cell protrusions.**

Immunofluorescence analysis of HUVEC protrusions generated on the underside of Transwell membranes and exposed to puromycin after cell body removal. Yellow dashed lines outline protrusion borders; scale bars = 10  $\mu$ m.

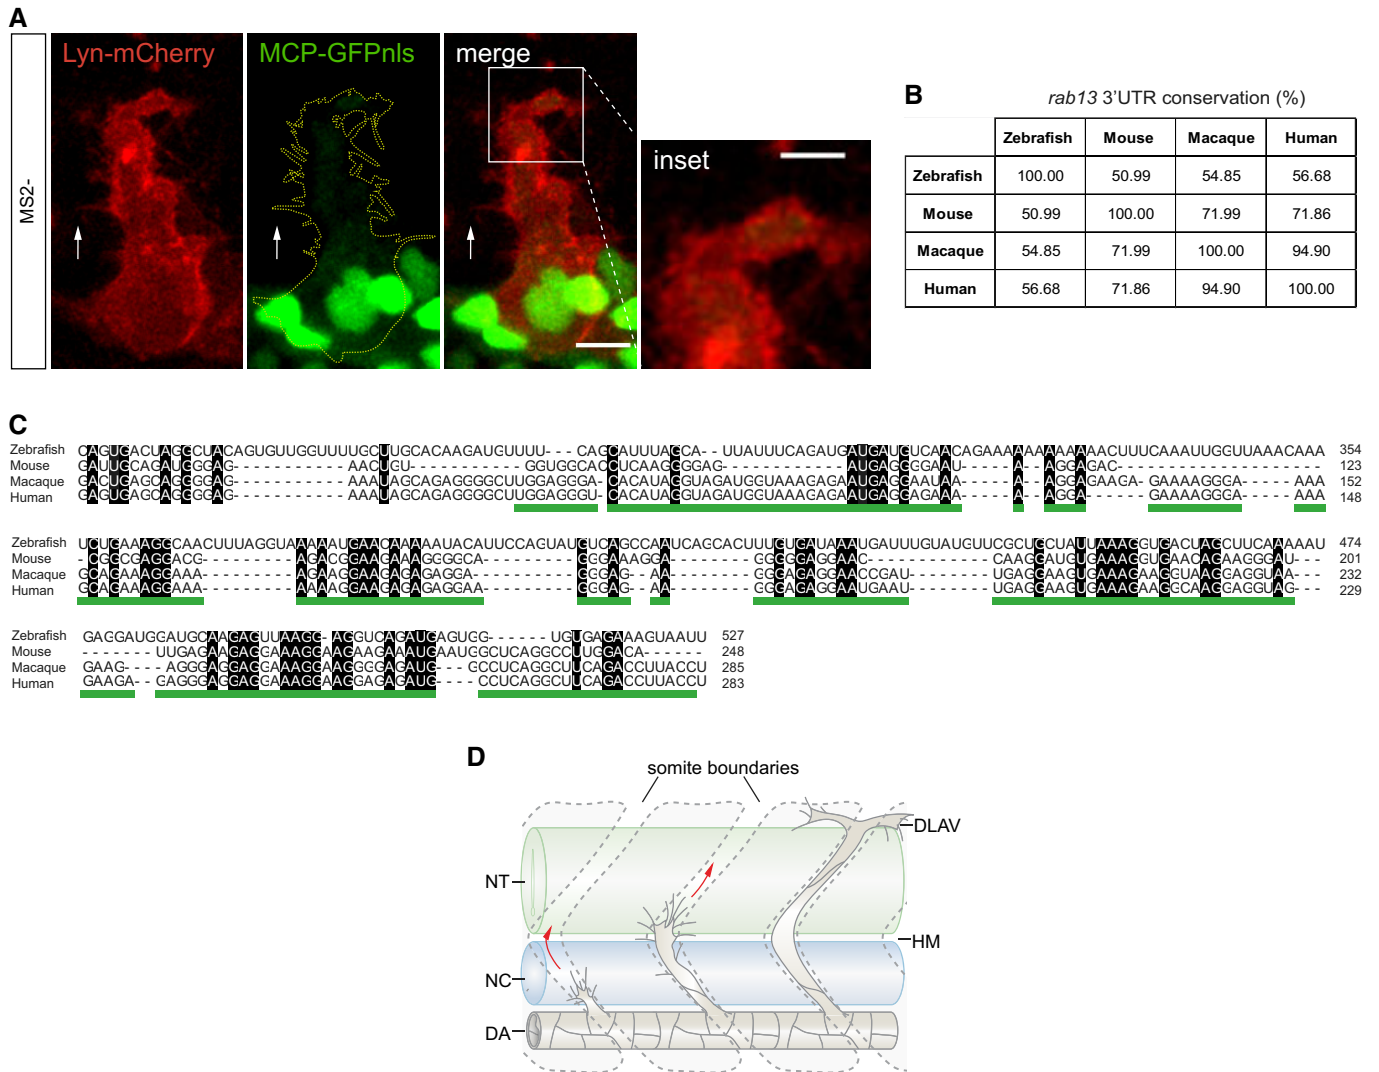

**Figure EV5. The 3'UTR of *rab13* shows low conservation across species whilst retaining mRNA localisation potential.**

A *Tg(fli1ep:MCP-GFPnl3)* tip cell expressing a control Lyn-mCherry-24xMS2 construct.

B Percentage identity matrix of *rab13* 3'UTR orthologue sequences.

C Multiple sequence alignment between *rab13* 3'UTR orthologues. Black boxes indicate absolute nucleotide similarity. The human *RAB13* 3'UTR localisation element is underlined in green.

D Scheme depicts stages of zebrafish ISV sprouting. DA: dorsal aorta; DLAV: dorsal longitudinal anastomotic vessel; HM: horizontal myoseptum; NC: notochord; NT: neural tube.

Data information: white arrows indicate direction of ISV sprouting; yellow dashed line outlines ISV cell borders; scale bars = 10  $\mu$ m; scale bar in inset = 5  $\mu$ m (A).
