# Supplementary material for: RAB13 mRNA compartmentalisation spatially orients tissue morphogenesis
Source: PubMed Central journal article supplement (PMC7604621; doi:10.15252/embj.2020106003), 2020-09-18
Supplement: EMBJ-39-e106003-s011.pdf [file EMBJ-39-e106003-s011.pdf]

**Gel scan used to generate Fig 3B**

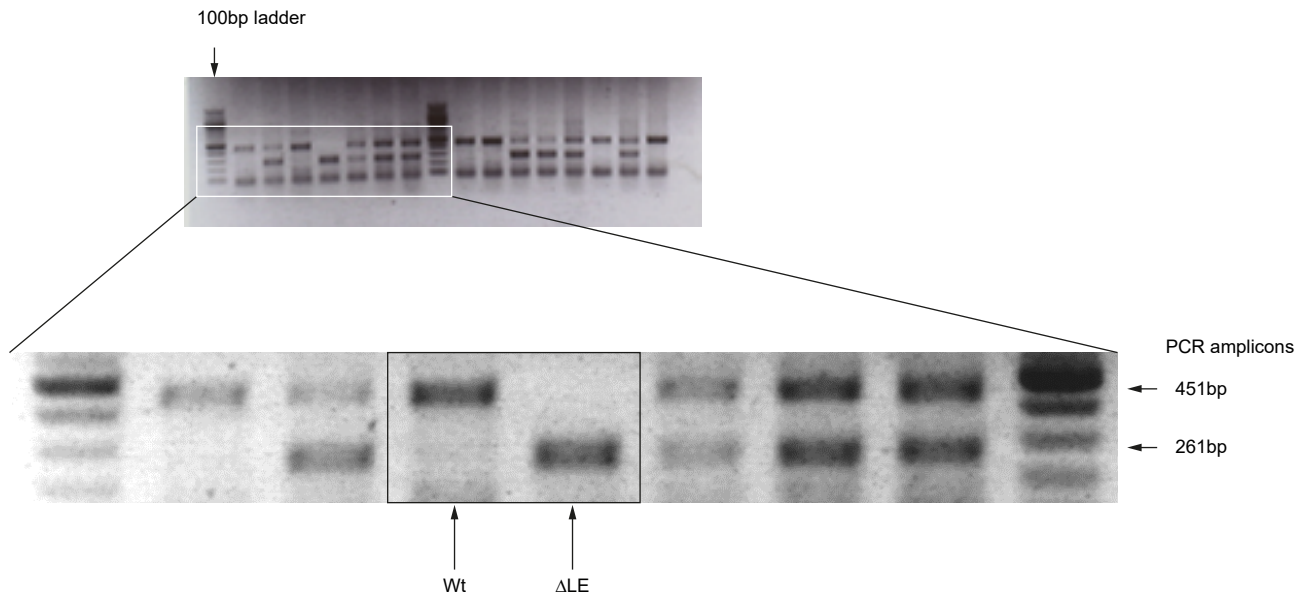

**Blot scans used to generate Fig 3G**

(RAB13 blot)

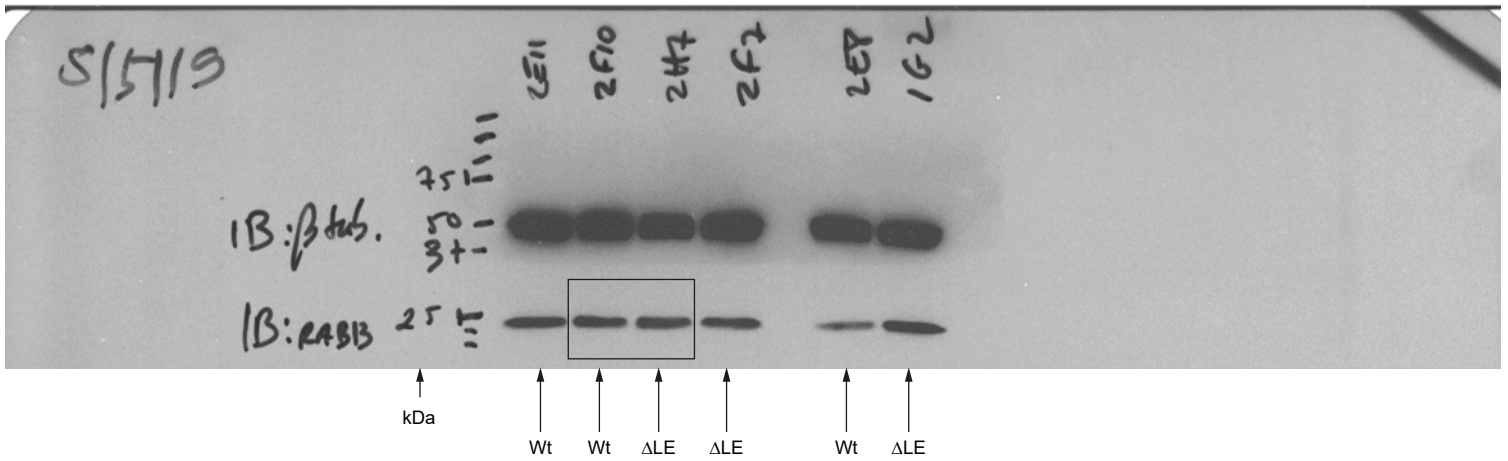

( $\beta$ -Tubulin blot)

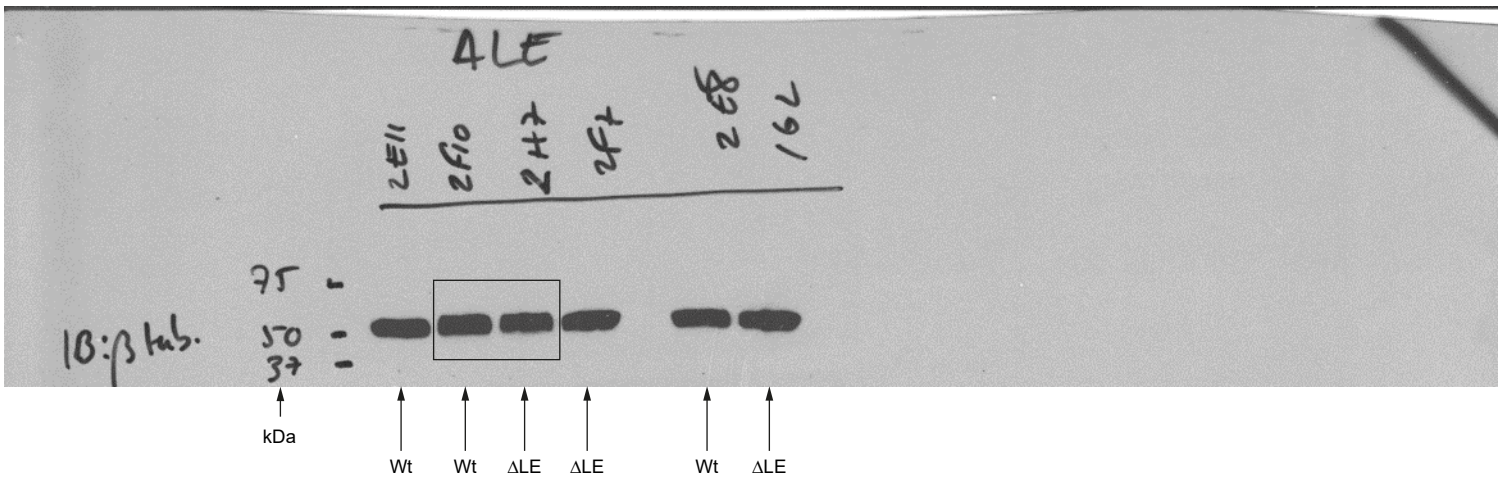

Black boxes indicate areas cropped for the main figures.
